# Supplementary material
Source: PubMed Central journal article supplement (PMC6210119)
Supplement: zam022188832s1.pdf [file zam022188832s1.pdf]

## SUPPLEMENTAL MATERIALS

### **Biochemical Characterization of CYP505D6, a Self-Sufficient Cytochrome P450 from the White-Rot Fungus *Phanerochaete chrysosporium***

Kiyota Sakai,<sup>a</sup> Fumiko Matsuzaki,<sup>b,c</sup> Lisa Wise,<sup>a</sup> Yu Sakai,<sup>a</sup> Sadanari Jindou,<sup>d</sup> Hirofumi Ichinose,<sup>b</sup> Naoki Takaya,<sup>e</sup> Masashi Kato,<sup>a</sup> Hiroyuki Wariishi,<sup>f</sup> Motoyuki Shimizu<sup>a#</sup>

<sup>a</sup> *Department of Applied Biological Chemistry, Faculty of Agriculture, Meijo University, Nagoya, Japan.*

<sup>b</sup> *Faculty of Agriculture, Kyushu University, Fukuoka, Japan.*

<sup>c</sup> *Research Center for Transomics Medicine, Medical Institute of Bioregulation, Kyushu University, Fukuoka, Japan.*

<sup>d</sup> *Faculty of Science and Technology, Meijo University, Nagoya, Japan.*

<sup>e</sup> *Graduate School of Life and Environmental Sciences, University of Tsukuba, Tsukuba, Japan.*

<sup>f</sup> *Faculty of Art and Science, Kyushu University, Fukuoka, Japan.*

Running Head: Diverse hydroxylation of fatty compounds by CYP505D6

#Address correspondence to Motoyuki Shimizu, moshimi@meijo-u.ac.jp.

**TABLE S1** Reaction products of saturated fatty alcohol (C9–18) and fatty acid (C9–18) conversions by CYP505D6

| Substrate            | Ratio of reaction product (%) |             |             |             |             |             |                |
|----------------------|-------------------------------|-------------|-------------|-------------|-------------|-------------|----------------|
|                      | $\omega$ -1                   | $\omega$ -2 | $\omega$ -3 | $\omega$ -4 | $\omega$ -5 | $\omega$ -6 | $\omega$ -7    |
| Fatty alcohol        |                               |             |             |             |             |             |                |
| C9 nonanol           | 11                            | 19          | 46          | 12          | 8           | 4           | - <sup>a</sup> |
| C10 decanol          | 10                            | 16          | 42          | 19          | 8           | 5           | -              |
| C11 undecanol        | 13                            | 20          | 22          | 25          | 12          | 8           | -              |
| C12 dodecanol        | 13                            | 36          | 29          | 6           | 5           | 8           | 3              |
| C13 tridecanol       | 16                            | 28          | 21          | 18          | 12          | 15          | -              |
| C14 tetradecanol     | 21                            | 23          | 26          | 11          | 11          | 8           | -              |
| C15 pentadecanol     | 24                            | 34          | 21          | 12          | 6           | 3           | -              |
| C16 hexadecanol      | 43                            | 29          | 17          | 11          | -           | -           | -              |
| C17 heptadecanol     | 54                            | 24          | 15          | 7           | -           | -           | -              |
| C18 octadecanol      | 14                            | 40          | 28          | 18          | -           | -           | -              |
| Fatty acid           |                               |             |             |             |             |             |                |
| C9 nonanoic acid     | 9                             | 38          | 20          | 18          | 11          | 4           | -              |
| C10 decanoic acid    | 17                            | 15          | 45          | 13          | 6           | 4           | -              |
| C11 undecanoic acid  | 10                            | 34          | 28          | 15          | 8           | 5           | -              |
| C12 dodecanoic acid  | 14                            | 25          | 32          | 12          | 10          | 7           | -              |
| C13 tridecanoic acid | 8                             | 32          | 25          | 21          | 7           | 7           | -              |

|     |                    |    |    |    |    |    |    |   |
|-----|--------------------|----|----|----|----|----|----|---|
| C14 | tetradecanoic acid | 17 | 16 | 26 | 13 | 14 | 14 | - |
| C15 | pentadecanoic acid | 7  | 42 | 35 | 6  | 5  | 5  | - |
| C16 | hexadecanoic acid  | 56 | 36 | 5  | 3  | -  | -  | - |
| C17 | heptadecanoic acid | 64 | 22 | 9  | 5  | -  | -  | - |
| C18 | octadecanoic acid  | 13 | 48 | 25 | 14 | -  | -  | - |

---

<sup>a</sup>Not detected. Data are presented as mean values of three independent experiments. The standard errors were <17%.

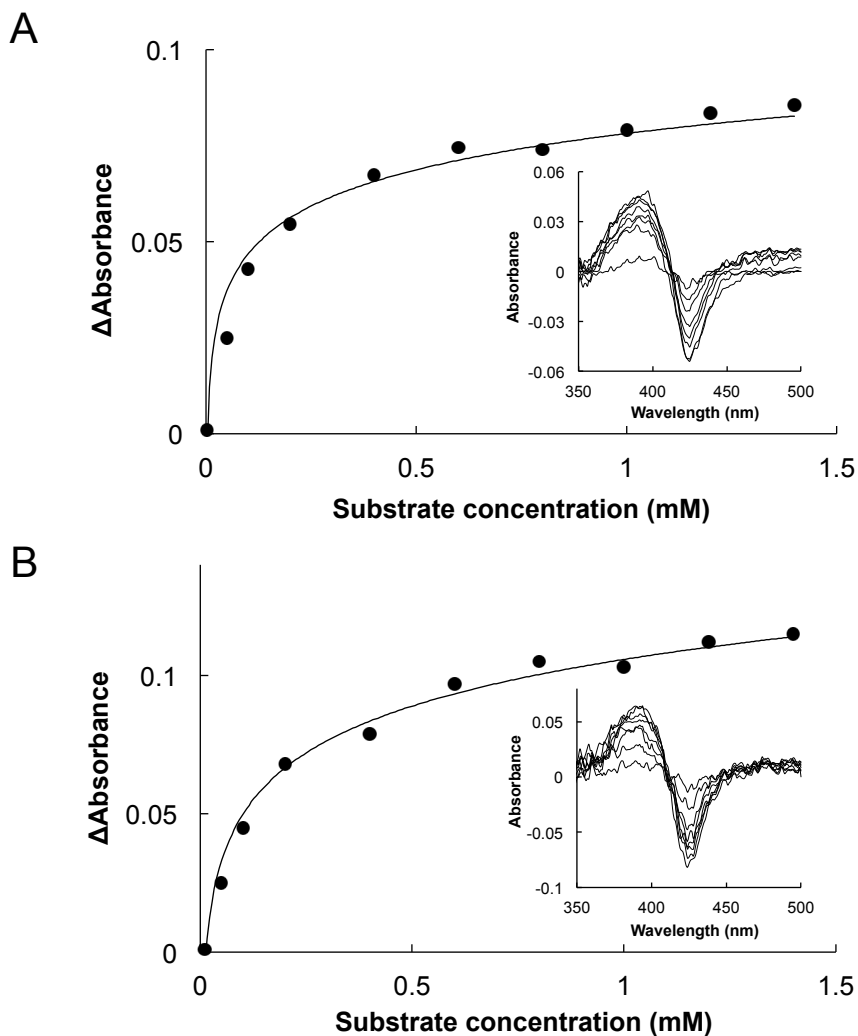

**FIG S1** Absorbance spectral changes upon binding of 1-dodecanol (A) and dodecanoic acid (B) to CYP505D6. CYP505D6 in 50 mM sodium phosphate buffer (pH 7.5) was titrated with a freshly prepared solution of 1-dodecanol and dodecanoic acid, and the absorbance changes were recorded following each addition (1-dodecanol; 0–1.4 mM, dodecanoic acid; 0–1.4 mM, final concentration). Insets show the plots of substrate-induced absorption changes from difference spectra generated by subtraction of the starting spectrum from subsequent spectra collected at each point in the titration. In both cases,  $A_{390}$  minus  $A_{420}$  data from the difference spectra are plotted versus each relevant substrate. A fit of each data set to a rectangular hyperbola produces  $K_d$  values of 81.5  $\mu$ M against 1-dodecanol and 155.8  $\mu$ M against dodecanoic acid, respectively, for the binding to CYP505D6.

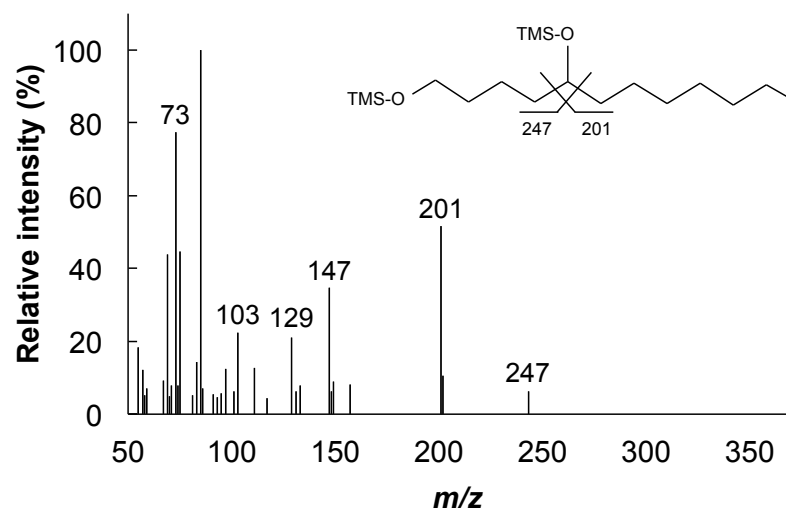

**FIG S2** Mass spectrum of 1,5-dodecanediol generated from 1-dodecanol in a CYP505D6-catalyzed reaction. The mass spectrum was obtained from the GC peak at the retention time (35.11 min) shown in Fig. 4A.

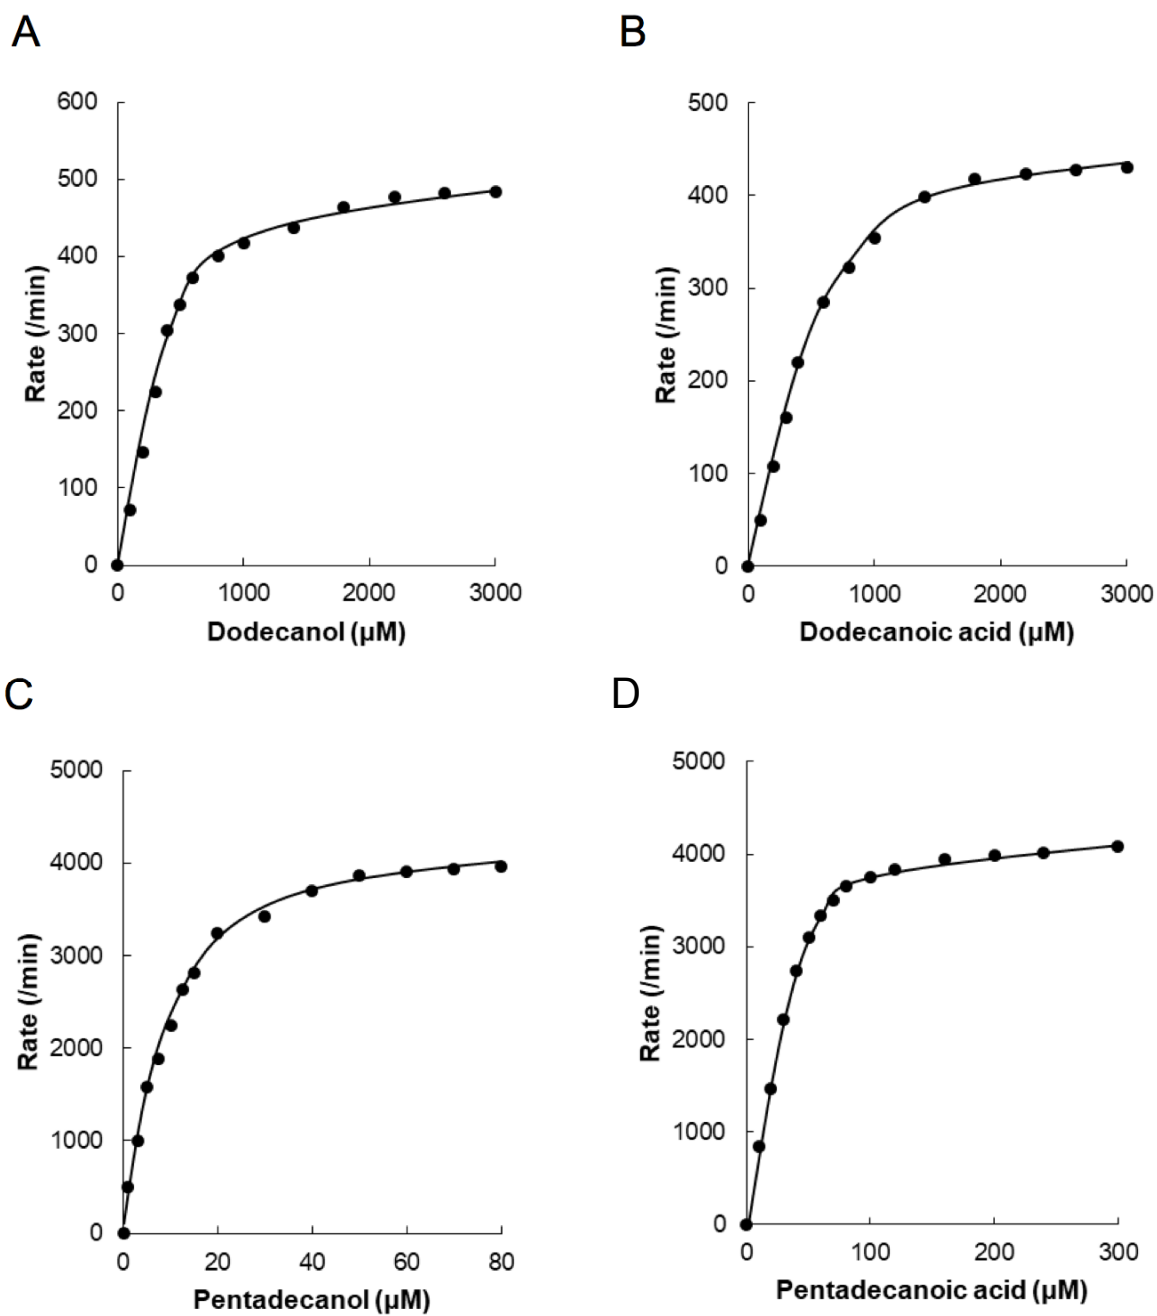

**FIG S3** Steady-state kinetics of 1-dodecanol (A), dodecanoic acid (B), 1-pentadecanol (C), and pentadecanoic acid (D) reacted with CYP505D6. Rate of NADPH oxidation catalyzed by CYP505D6 in the presence of various concentrations of fatty alcohols and fatty acids (C12 and C15).  $K_m$  and  $k_{cat}$  values are described in Table 1.

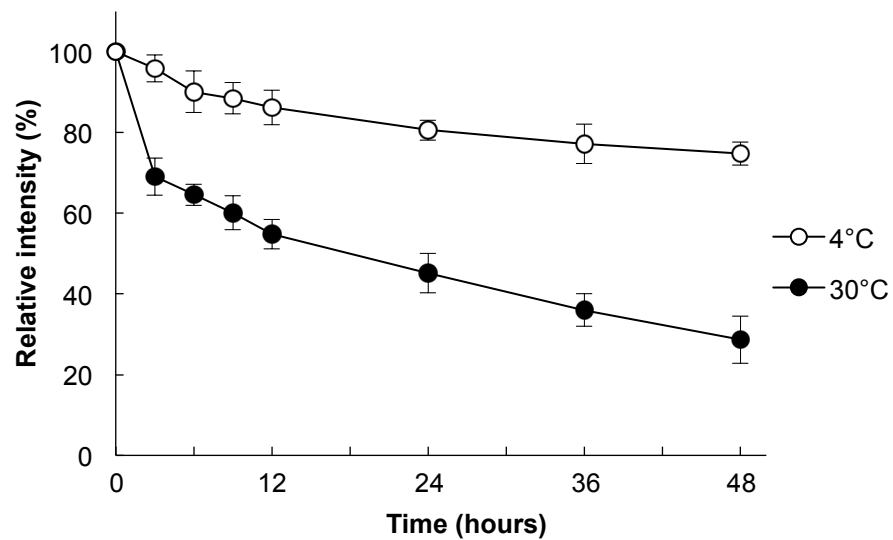

**FIG S4** Thermostabilities of CYP505D6 at 4°C (open circles) and 30°C (closed circles). The thermostability of CYP505D6 was determined using dodecanoic acid as the substrate. Purified CYP505D6 was preincubated at 4°C or 30°C for 3, 6, 9, 12, 24, 36, or 48 h. Residual CYP505D6 activity was assayed in reaction mixtures (0.5 ml) containing 125  $\mu$ M dodecanoic acid, 125  $\mu$ M NADPH, 1  $\mu$ M FMN, 1  $\mu$ M FAD, 10% (v/v) glycerol, and purified enzyme in 50 mM sodium phosphate (pH 7.5). The activity of CYP505D6 without preincubation was set to 100%. Data are presented as mean values  $\pm$  standard deviation (error bars) of three independent experiments.

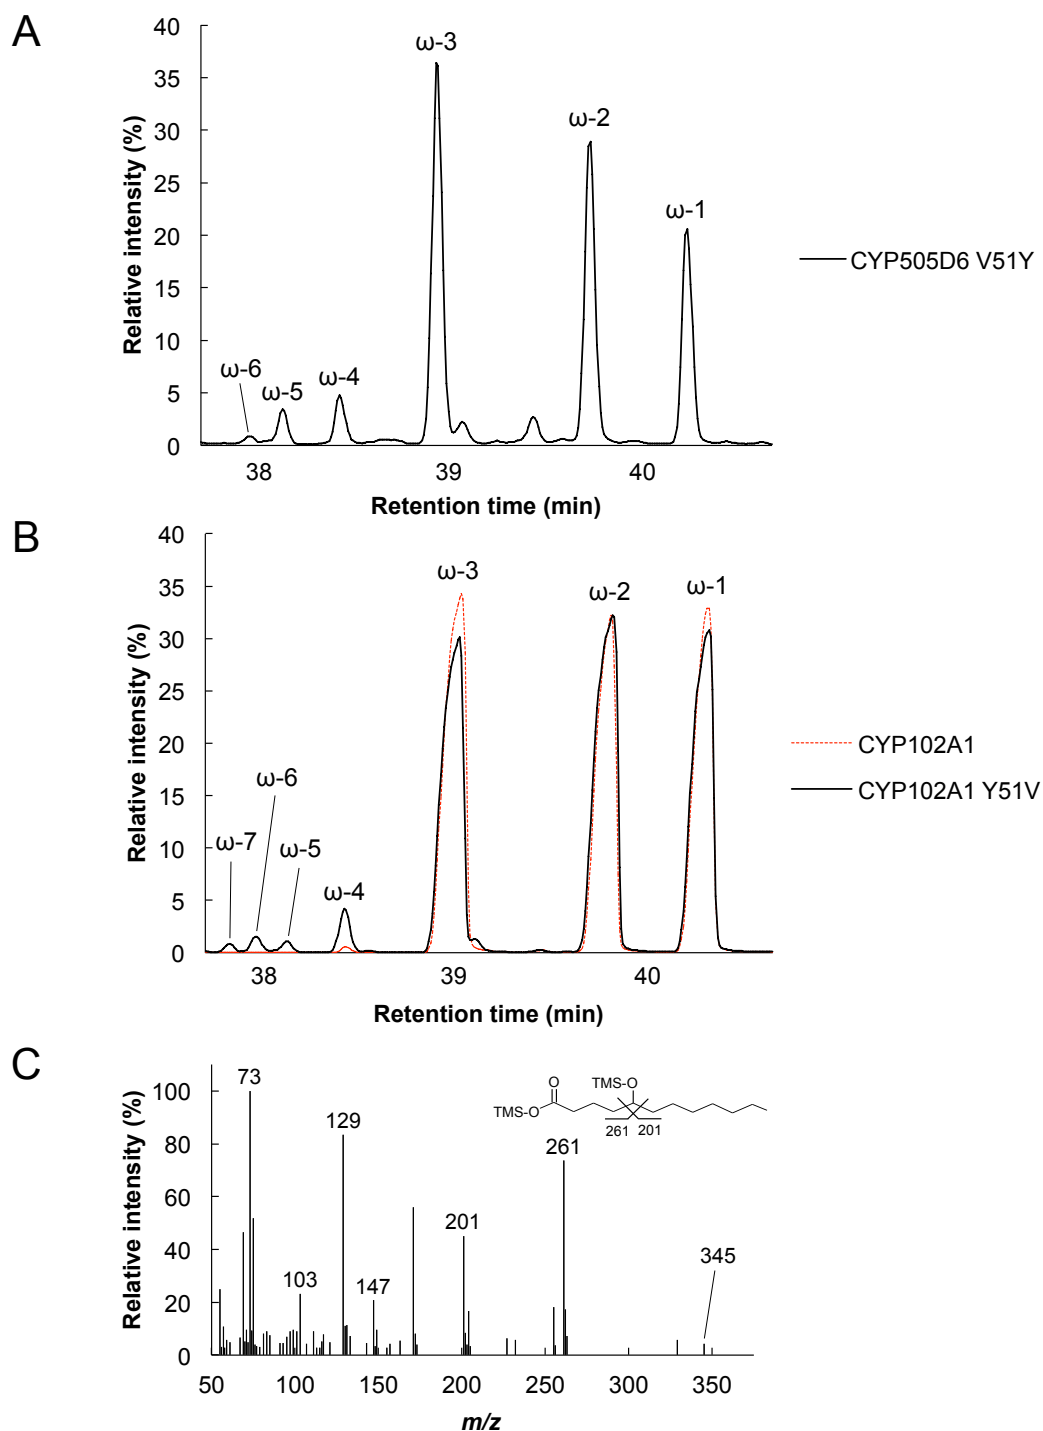

**FIG S5** Total ion chromatograms and mass spectrum of the products of reactions catalyzed by CYP505D6 V51Y, CYP102A1, and CYP102A1 Y51V with dodecanoic acid as the substrate. The TMS derivation reaction products from reactions catalyzed by CYP505D6 V51Y (A), and CYP102A1 and CYP102A1 Y51V (B) were analyzed using GC-MS. The mass spectrum of 5-hydroxydodecanoic acid was obtained from the GC peak at the retention time (37.77 min) shown in Fig. S5B (C).
